# Supplementary material for: Overlapping cell population expression profiling and regulatory inference in C. elegans
Source: PubMed Central journal article supplement (PMC4772325; doi:10.1186/s12864-016-2482-z), 2016-02-29

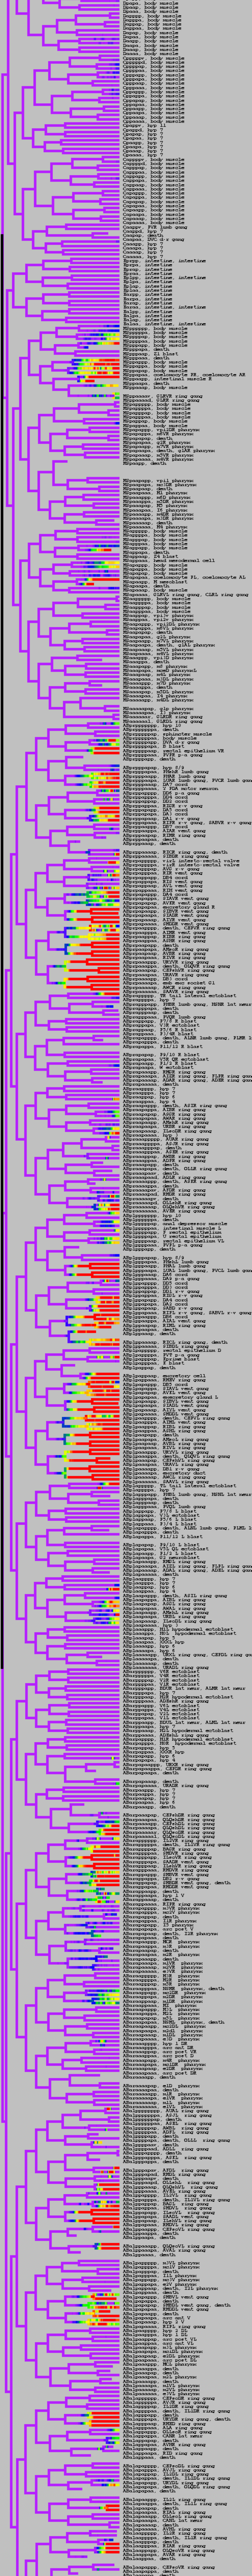





















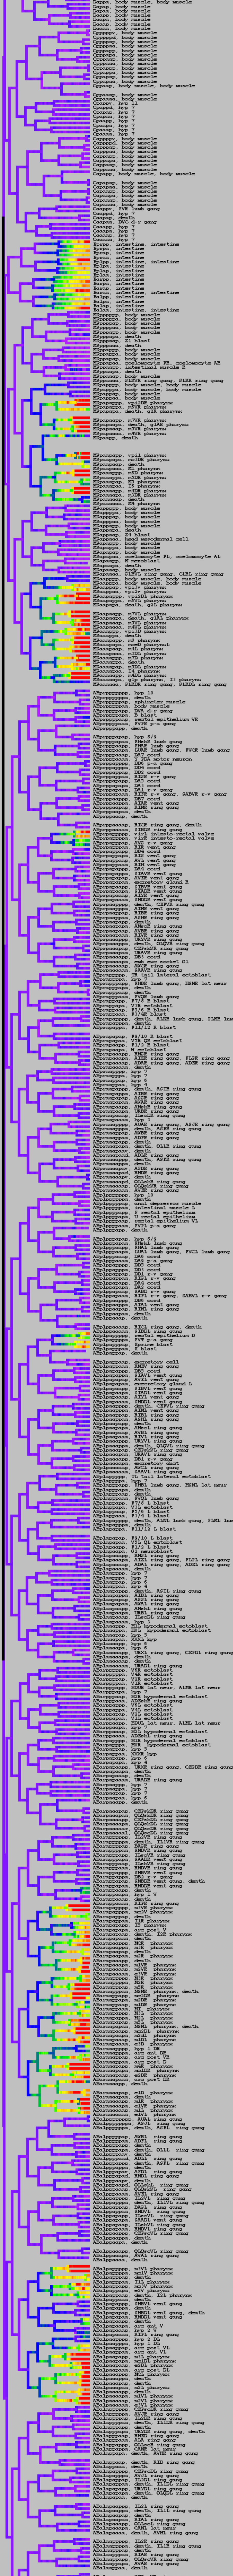

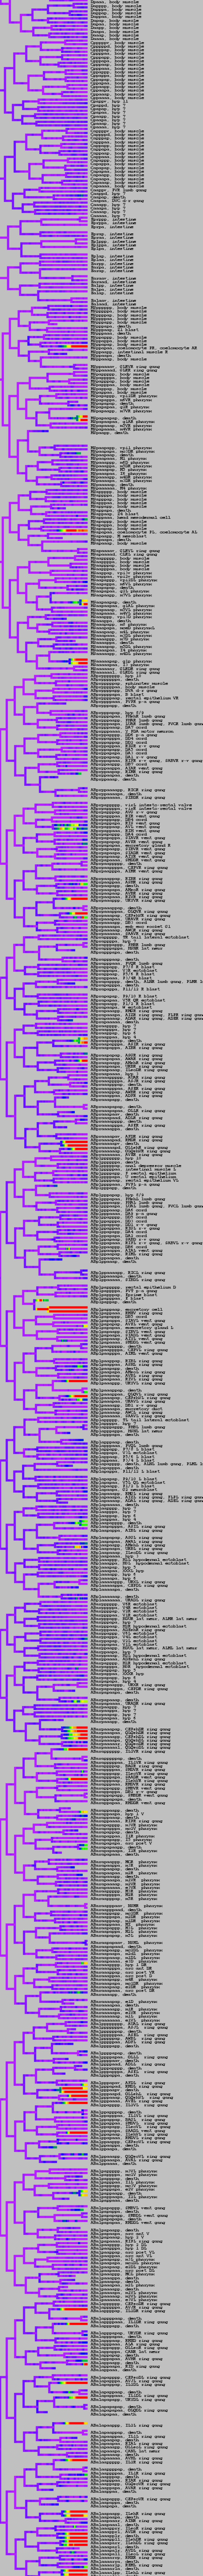

Supplement: 12864_2016_2482_MOESM2_ESM.pdf [file 12864_2016_2482_MOESM2_ESM.pdf]
